# Supplementary material for: Ataxia telangiectasia alters the ApoB and reelin pathway
Source: Springer Nature journal article supplement (doi:10.1007/s10048-018-0557-5), 2018-10-20
Supplement: MOESM4 [file 16214518]

**Supplementary Table 1.** Linear interaction model of protein label-free quantitation values from CSF and age in patients with A-T (n=11) vs. control individuals (n=9).

| **Protein** | **Linear interaction model** | | |  |
| --- | --- | --- | --- | --- |
| **Age** | **Group** | **Age:Group** | **t test Group** |
| RELN | 0.000001 | 0.140 | 0.0001 | 0.001 |
| CALB1 | 0.000003 | 0.002 | 0.001 | 0.416 |
| CPN2 | 0.011 | 0.018 | 0.001 | 0.247 |
| CBLN3 | 0.0001 | 0.715 | 0.001 | 0.0002 |
| ITIH2 | 0.000 | 0.073 | 0.001 | 0.019 |
| FAT2 | 0.001 | 0.093 | 0.002 | 0.018 |
| CHGB | 0.006 | 0.215 | 0.005 | 0.013 |
| CBLN1 | 0.005 | 0.412 | 0.008 | 0.003 |
| ITIH4 | 0.111 | 0.085 | 0.010 | 0.269 |
| ITIH1 | 0.005 | 0.347 | 0.011 | 0.009 |
| ARPC4 | 0.527 | 0.044 | 0.013 | 0.956 |
| APOB | 0.013 | 0.089 | 0.015 | 0.228 |
| LAMA4 | 0.382 | 0.122 | 0.024 | 0.506 |
| FCN3 | 0.067 | 0.055 | 0.030 | 0.959 |
| CHAD | 0.000 | 0.527 | 0.034 | 0.021 |
| MMP2 | 0.010 | 0.263 | 0.074 | 0.207 |
| CTSD | 0.034 | 0.239 | 0.090 | 0.346 |
| CD5L | 0.193 | 0.674 | 0.091 | 0.038 |
| EFEMP1 | 0.068 | 0.166 | 0.096 | 0.724 |
| C4BPA | 0.258 | 0.289 | 0.107 | 0.459 |
| IGHM | 0.334 | 0.628 | 0.148 | 0.143 |
| C6 | 0.438 | 0.787 | 0.171 | 0.080 |
| APCS | 0.134 | 0.139 | 0.181 | 0.587 |
| SPOCK2 | 0.763 | 0.792 | 0.192 | 0.113 |
| SPARC | 0.017 | 0.763 | 0.194 | 0.061 |
| SEMA7A | 0.549 | 0.970 | 0.211 | 0.157 |
| FCGR3A | 0.888 | 0.252 | 0.215 | 0.658 |
| NEU1 | 0.466 | 0.860 | 0.241 | 0.075 |
| CNTN6 | 0.206 | 0.665 | 0.296 | 0.006 |
| COL6A1 | 0.295 | 0.923 | 0.309 | 0.037 |
| SERPINE2 | 0.138 | 0.676 | 0.387 | 0.011 |
| CNTN2 | 0.731 | 0.386 | 0.394 | 0.732 |
| CLU | 0.133 | 0.618 | 0.406 | 0.014 |
| MANBA | 0.782 | 0.893 | 0.524 | 0.387 |
| PON1 | 0.216 | 0.411 | 0.594 | 0.011 |
| IGLV2-14 | 0.647 | 0.966 | 0.652 | 0.514 |
| ACAN | 0.277 | 0.824 | 0.734 | 0.200 |
| C4B | 0.043 | 0.443 | 0.743 | 0.284 |
